# Supplementary material for: Antimicrobial Resistance in Food Animals and the Environment in Nigeria: A Review
Source: Int J Environ Res Public Health. 2018 Jun 17;15(6):1284. doi: 10.3390/ijerph15061284 (PMC6025306; doi:10.3390/ijerph15061284)
Supplement: Supplementary file 1 [file ijerph-15-01284-s001.zip]

Archive with 21 entries (21 files):
- Suppl/Excel Tables.xlsx
- Suppl/Figure S1.pdf
- Suppl/Figure S10.pdf
- Suppl/Figure S11.pdf
- Suppl/Figure S12.pdf
- Suppl/Figure S13.pdf
- Suppl/Figure S14.pdf
- Suppl/Figure S15.pdf
- Suppl/Figure S16.pdf
- Suppl/Figure S17.pdf
- Suppl/Figure S18.pdf
- Suppl/Figure S2.pdf
- Suppl/Figure S3.pdf
- Suppl/Figure S4a.pdf
- Suppl/Figure S4b.pdf
- Suppl/Figure S5a.pdf
- Suppl/Figure S5b.pdf
- Suppl/Figure S6.pdf
- Suppl/Figure S7.pdf
- Suppl/Figure S8.pdf
- Suppl/Figure S9.pdf
