# Supplementary material for: Antimicrobial Resistance in Food Animals and the Environment in Nigeria: A Review
Source: Int J Environ Res Public Health. 2018 Jun 17;15(6):1284. doi: 10.3390/ijerph15061284 (PMC6025306; doi:10.3390/ijerph15061284)
Supplement: Supplementary file 1 [file ijerph-15-01284-s001.zip › Suppl/Excel Tables.xlsx]

## Sheet: S1; Raw data AMRS
	Reference	Pub year	Study ID	Sample site	Geozone	Sample size	Sample Host	Samples	Microrganism	Organism	Amikacin	Amoxicillin	Amoxicillin-clavunanic acid	Ampicillin	Ampicillin-cloxacillin	Apramycin	Aztreonam	Cefepime	Cefotaxime	Cefoxitin	Ceftazidime	Ceftiofur	Ceftriaxone	Cefuroxime	Chloramphenicol	Ciprofloxacin	Clindamycin	Cloxacillin	Colistin	Doxycycline	Enrofloxacin	Erythromycin	Florfenicol	Flumequine	Fusidic acid	Gentamycin	Imipenem	Kanamycin	Linezolid	Nalidixic acid	Neomycin	Nitrofuran	Norfloxacin	Meropenem	Mupirocin	Ofloxacin	Oxacillin	Penicillin	Pefloxacin
1	Mzungu Ignatius(a)	2007	Mzungu2007a	Zaria	NW	156	Environment	Dumpsite soil & water	Staphlococcus aureus	Staphlococcus		20	9																							0				90		0				0
	Mzungu Ignatius (b)	2007	Mzungu2007b	Zaria	NW	156	Environment	Dumpsite soil & water	E. Coli	Escherichia coli		56	33																							4				10		20				0
	Mzungu Ignatius (c)	2007	Mzungu2007c	Zaria	NW	156	Environment	Dumpsite soil & water	Pseudomonas aeroginosa	Pseudomonas		84	75																							47				18		62				3
2	David & Odeyemi	2007	DavidOdeyemi2007	Ado Ekiti	SW	196	Environmental	Cow manure, agric soil, Vegetables	Listeria monocytogenes	Listeria		35.95	39.72												52.29			25.94				28.1				38.56
3	Adetunji & Adegoke	2008	Adetunjigoke2008	Southwestern	SW	40	Cattle	wara (soft cheese)	Listeria monocytogenes	Listeria			12.5	63												63						37.5				37.5
4	Adelowo Fagade	2009	Adelowo2009	Southwestern	SW	21	Environment	Polluted river	Multiple organisms	Multiple organisms																100						100
5	Rauf et al	2009	Rauf2009	Maiduguri	NE	865	Poultry	Feaces, cloacal swab, lungs, intestine, cecum	Salmonella Hiduddify	Salmonella			0	0		0						0			2.4	56.1			0				2.4			0				56.1	0
6	Muhammad et al	2010	Muhammad2010	Jos	NC	500	Poultry (Hatchery)	Meconiun, dead chicks, dead in shell, egg shell	Salmonella Kentucky and Hadar	Salmonella			0	0					0						0	77.8			0		100					75.6		2		100
7	Ayeni et al (a)	2009	Ayeni2009a	Southwestern	SW	96	Cattle	Dairy products and intestines	E. coli	Escherichia coli	9		18	5			5		14		5		14	27		73										36				68		14							59
	Ayeni et al (b)	2009	Ayeni2009b	Southwestern	SW	96	Cattle	Dairy products and intestines	E. Cloacae	Enterobacter	0		25	0			50		25		50		50	50		50										25				75		75							75
	Ayeni et al (c)	2009	Ayeni2009c	Southwestern	SW	96	Cattle	Dairy products and intestines	Citrobacter spp	Citrobacter	50		50	0			0		100		0		50	100		50										50				100		50							0
	Ayeni et al (d)	2009	Ayeni2009d	Southwestern	SW	96	Cattle	Dairy products and intestines	Klebissiella pneumoniae	Klebissiella	0		50	0			0		0		0		0	50		100										0				100		100							50
	Ayeni et al (e)	2009	Ayeni2009e	Southwestern	SW	96	Cattle	Dairy products and intestines	Pseudomonas spp.	Pseudomonas	40		100	60			40		60		40		60	100		40										60				60		60							20
	Ayeni et al (f)	2009	Ayeni2009f	Southwestern	SW	96	Cattle	Dairy products and intestines	Proteus mirabilis	Proteus	50		100	100			100		50		75		50	100		75										0				75		75							50
8	Garba et al	2009	Garba2009	Gusau (N/W)	NW	180	Environment	Well water, tap water, packaged water	E. Coli	Escherichia coli		50	20												11.6	28.3										0										13.3			0
9	Fashae et al	2010	Fashae2010	Ibadan	SW	641	Poultry	Feaces	Salmonella	Salmonella			26	27												87										20				81	11
	Fashae et al	2010	Fashae2010b	Ibadan	SW	991	Human	Blood	Salmonella	Salmonella			54	59		0			0			0			36	3			0				0			0				3	0
11	Odeyemi et al	2010	Odeyemi2010	Ado Ekiti	SW	50	Environmental	Water, soil	Enterococcus	Enterococcus																	72					94			90	48												100
12	Ojo et al	2010	Ojo2010	Ibadan	SW	2133	Cattle, sheep, goats, pigs	Meat, faeces	E. Coli	Escherichia coli				82.5											42.9	21.1					25.3									37.7	24		20.8
14	Adesiji et al (a)	2011	Adesiji2011a	Osogbo	SW	300	Chicken, cattle, goat, pig	Meat	Staphlococcus aureus	Staphlococcus		100			100								100	0								0				0											0		0
	Adesiji et al (b)	2011	Adesiji2011b	Osogbo	SW	300	Chicken, cattle, goat, pig	Meat	Aerobacter	Aerobacter		100														68.4										84.2										84	100		84
	Adesiji et al (c)	2011	Adesiji2011c	Osogbo	SW	300	Chicken, cattle, goat, pig	Meat	E. Coli	Escherichia coli		84.6			0								0	0		0						0				0										0	0		0
	Adesiji et al (d)	2011	Adesiji2011d	Osogbo	SW	300	Chicken, cattle, goat, pig	Meat	Salmonella	Salmonella		100														0																				0			0
15	Fortini et al	2011	Fortini2011	Ibadan	SW	200	Chicken and pigs	Faeces	E. Coli	Escherichia coli
16	Amosun et al (a)	2012	Amosun et al2012a	Ibadan	SW	205	Cattle	Milk	E. Coli	Escherichia coli				85.7																										28.6	21.4
	Amosun et al (b)	2012	Amosun et al2012b	Ilorin	NC	205	Cattle	Milk	E. Coli	Escherichia coli				100																										35.9	25.6
	Amosun et al (c)	2012	Amosun et al2012c	Kaduna	NW	205	Cattle	Milk	E. Coli	Escherichia coli				18																										0	48.8
	Amosun et al (d)	2012	Amosun et al2012d	Ibadan	SW	205	Cattle	Milk	Klebsiella Pneumonia	Klebsiella				100																										19.4	96.8
	Amosun et al (e)	2012	Amosun et al2012e	Ilorin	NC	205	Cattle	Milk	Klebsiella Pneumonia	Klebsiella				79																										0	57.8
	Amosun et al (f)	2012	Amosun et al2012f	Kaduna	NW	205	Cattle	Milk	Klebsiella Pneumonia	Klebsiella				94.1																										5.9	29.4
	Amosun et al (g)	2012	Amosun et al2012g	Ibadan	SW	205	Cattle	Milk	Pseudomonas aeroginosa	Pseudomonas				84.2																										0	36.8
	Amosun et al (h)	2012	Amosun et al2012h	Ilorin	NC	205	Cattle	Milk	Pseudomonas aeroginosa	Pseudomonas				44.4																										0	0
	Amosun et al (i)	2012	Amosun et al2012i	Kaduna	NW	205	Cattle	Milk	Pseudomonas aeroginosa	Pseudomonas				0																										0	0
17	Damian U I	2012	Damian2012	Zaria	NW	200	Cattle	Milk	Multiple organisms	Multiple organisms			83.01												83			99.35				98				17										0.7
18	Igbinosa et al	2012	Igbinosa2012	Benin	SS	75	Environment	Water, abattoir effluent	Pseudomonas aeroginosa	Pseudomonas	94.29						94.29	88.58			80																91.43							91.43
19	Akobi et al	2012	Akobi2012	Ile Ife	SW	560	Bats	Faeces	Staphlococcus aureus	Staphlococcus										0					0	5.6	3.7					7.5			2.8	0									0		0	3.7
20	Ojo et al	2012	Ojo2012	Abeokuta	SW	200	Poultry	chicken organs	Multiple organisms	Multiple organisms																40.5					21									9.5			44
21	Fashae et al	2013	Fashae2013	Ibadan	SW	306	Pig	Faeces	Salmonella enterica serovars	Salmonella															11.6	0.9										0.9				15.2
22	Mailafia (a)	2013	Mailafia2013a	Gwagwalada	NC	160	Environment	Naira notes	Staphlococcus spp	Staphlococcus				100																		100				100												100
	Mailafia (b)	2013	Mailafia2013b	Gwagwalada	NC	160	Environment	Naira notes	Bacillus	Bacillus				100																		100				100												0
	Mailafia (c)	2013	Mailafia2013c	Gwagwalada	NC	160	Environment	Naira notes	Clostridium	Clostridium				100																		0				100												100
	Mailafia (d)	2013	Mailafia2013d	Gwagwalada	NC	160	Environment	Naira notes	E. Coli	Escherichia coli				0																		0				0												100
	Mailafia (e)	2013	Mailafia2013e	Gwagwalada	NC	160	Environment	Naira notes	Streptococcus spp	Streptococcus				100																		100				100												100
23	Oluduro et al (a)	2012	Oluduro2012a	Ile Ife	SW	125	Bats	Faeces	E. Coli	Escherichia coli			92	82									30			2										22						54				1			2
	Oluduro et al (b)	2012	Oluduro2012b	Ile Ife	SW	125	Poultry	Broiler faeces	E. Coli	Escherichia coli			74	64									24			32										54						44				7			30
	Oluduro et al (c)	2012	Oluduro2012c	Ile Ife	SW	125	Poultry	Free range chicken faeces	E. Coli	Escherichia coli			60	80									32			12										40						68				12			0
26	Kawo et al (a)	2013	Kawo2013a	Kano	NW	30	Environment	Mobile cell phone	E. Coli	Escherichia coli		10	57.1													71.4										28.6													100
	Kawo et al (b)	2013	Kawo2013b	Kano	NW	30	Environment	Mobile cell phone	Staph. Aureus	Staphlococcus		53.3	53.3													93.3										20													80
	Kawo et al (c)	2013	Kawo2013c	Kano	NW	30	Environment	Mobile cell phone	Salmonella spp.	Salmonella		100	50													100										0													0
	Kawo et al (d)	2013	Kawo2013d	Kano	NW	30	Environment	Mobile cell phone	Klebsiella spp	Klebsiella		75	100													75										25													100
27	Ogunleye et al	2013	Ogunleye2013a	Ibadan	SW	1	Poultry	Organs	Salmonella ituri	Salmonella				1											75
	Ogunleye et al	2013	Ogunleye2013b	Ibadan	SW	1	Poultry	Organs	Salmonella Kentucky	Salmonella				75											75
	Ogunleye et al	2013	Ogunleye2013c	Ibadan	SW	1	Poultry	Organs	Salmonella Typhimurium DT104	Salmonella				75											75
28	Oviasogie et al (a)	2013	Oviasogie2013a	Benin	SS	165	Environment, Human	Mucipal waste, Human hand and cloth swabs	Bacillus subtillis	Bacillus		40			20								25		25	5						30				5										10			0
	Oviasogie et al (b)	2013	Oviasogie2013b	Benin	SS	165	Environment, Human	Mucipal waste, Human hand and cloth swabs	Bacillus cereus	Bacillus		28.6			28.6								28.6		0	0						42.9				0										14.3			0
	Oviasogie et al (c)	2013	Oviasogie2013c	Benin	SS	165	Environment, Human	Mucipal waste, Human hand and cloth swabs	Staphlococcus aureus	Staphlococcus		37.5			12.5								12.5		25	0						37.5				0										0			0
	Oviasogie et al (d)	2013	Oviasogie2013d	Benin	SS	165	Environment, Human	Mucipal waste, Human hand and cloth swabs	Staph. epidemidis	Staphlococcus		33.4			20								20		33.4	0						13.4				0										6.7			6.7
	Oviasogie et al (e)	2013	Oviasogie2013e	Benin	SS	165	Environment, Human	Mucipal waste, Human hand and cloth swabs	Escherichia coli	Escherichia coli		28.6			28.6								14.3		14.3	4.8						47.6				14.3										14.5			9.5
	Oviasogie et al (f)	2013	Oviasogie2013f	Benin	SS	165	Environment, Human	Mucipal waste, Human hand and cloth swabs	Proteus mirabilis	Proteus		45.5			36.4								27.3		18.2	0						45.5				0										0			0
	Oviasogie et al (g)	2013	Oviasogie2013g	Benin	SS	165	Environment, Human	Mucipal waste, Human hand and cloth swabs	Proteus vulgaris	Proteus		28.6			28.6								14.3		14.3	0						42.9				0										28.6			14.3
	Oviasogie et al (h)	2013	Oviasogie2013h	Benin	SS	165	Environment, Human	Mucipal waste, Human hand and cloth swabs	Proteus rettgerri	Proteus		100			50								50		0	0						100				0										50			0
	Oviasogie et al (i)	2013	Oviasogie2013i	Benin	SS	165	Environment, Human	Mucipal waste, Human hand and cloth swabs	Streptococcus pyogenes	Streptococcus		0			0								33.3		32.3	16.7						33.3				0										33.3			0
	Oviasogie et al (j)	2013	Oviasogie2013j	Benin	SS	165	Environment, Human	Mucipal waste, Human hand and cloth swabs	Enterococcus faecalis	Enterococcus		35.7			21.4								7.2		42.9	0						28.6				7.2										33.3			0
	Oviasogie et al (k)	2013	Oviasogie2013k	Benin	SS	165	Environment, Human	Mucipal waste, Human hand and cloth swabs	Klebsiella pneumoniae	Klebsiella		100			100								40		40	20						80				20										33.3			20
	Oviasogie et al (l)	2013	Oviasogie2013l	Benin	SS	165	Environment, Human	Mucipal waste, Human hand and cloth swabs	Klebsiella aerogenes	Klebsiella		71.4			71.4								14.3		42.9	14.3						42.9				28.6										33.3			0
	Oviasogie et al (m)	2013	Oviasogie2013m	Benin	SS	165	Environment, Human	Mucipal waste, Human hand and cloth swabs	Pseudomonas aeroginosa	Pseudomonas		81.8			81.8								9.1		54.6	0						72.7				27.3										33.3			9.1
	Oviasogie et al (n)	2013	Oviasogie2013	Benin	SS	165	Environment, Human	Mucipal waste, Human hand and cloth swabs	Citrobacter freundii	Citrobacter		77.8			66.7								22.2		11.1	0						66.4				11.1										33.3			11.1
	Oviasogie et al (o)	2013	Oviasogie2013o	Benin	SS	165	Environment, Human	Mucipal waste, Human hand and cloth swabs	Serratia marcescens	Serratia		100			100								25		100	0						100				0										33.3			25
29	Rauf et al	2013	Rauf2013	Northwestern	NW	1888	Cattle, Camels, Poultry, Fish, Vegetable, Human	Organe, faeces	Salmonella spp.	Salmonella			0	9		0			1			0			5	9			1				1			7				9	3
30	Suleiman et al	2013	Suleiman2013	Maiduguri	NE	100	Poultry	Trachea swab	Staphylococcus aureus	Staphylococcus			33.3	100									57.4			0	51.9					100				0										57.4
31	Adelowo et al	2014	Adelowo2014	Ogbomoso, Ibadan, Osogbo	SW		Poultry, Swine	Faeces, water, soil	E. Coli	Escherichia coli			0	36		0			0			0			22	42			0				0			8				25	14
32	Adefarakan et al (a)	2014	Adefarakan2014a	Ile Ife	SW	400	Ram	Rectal swab	E. Coli	Escherichia coli		69.79	29.17										98.96		13.54	10.42										21.88						97				15.63			6.25
	Adefarakan et al (b)	2014	Adefarakan2014b	Ile Ife	SW		Goat	Rectal swab	E. Coli	Escherichia coli		12.86	70										15.71		15.71	15.71										84.28						95.71				1.43			27.14
33	Adeyanju et al (a)	2014	Adeyanju2014a	Ibadan	SW	152	Poultry	Meat	Salmonella	Salmonella			100																							29				73		56				16
	Adeyanju et al (b)	2014	Adeyanju2014b	Ibadan	SW		Poultry	Meat	E. Coli	Escherichia coli			100																							28.3				59		52				24
	Rauf et al	2014	Rauf2014	Maiduguri	NE	300	Vegetables	Vegetables	Salmonella Hadar	Salmonella			0	8		0			0			0			0	8			0				8			0				8	15
35	Rauf et al	2015	Rauf2015	Maiduguri	NE	200	Camel	Faeces, organs	Salmonella spp.	Salmonella			0	0			0		0			0			0	0			0				0			0				0	0
36	Adenipekun et al (a)	2015	Adenipekun2015a	Lagos	SW	350	Cattle	Faeces	E. Coli	Escherichia coli	0			35			0	0		1	0		0	0		1.9										2.9								0
	Adenipekun et al (b)	2015	Adenipekun2015b	Lagos	SW		Chicken	Faeces	E. Coli	Escherichia coli	0			41.3			6.3	0		0	0		6.3	6.3		10										20								0
	Adenipekun et al (c)	2015	Adenipekun2015c	Lagos	SW		Pig	Faeces	E. Coli	Escherichia coli	0			10.7			3.6	0		0	0		3.6	3.6		3.6										0								0
37	Olowe et al	2015	Olowe2015	Ado Ekiti	SW	350	Cattle, pigs	Faeces	E. Coli	Escherichia coli		88	96	89					92		58			83	92	5		84				82				49	0					0				5	96
38	Olonitola et al (a)	2015	Olonitola2015a	Zaria	NW	400	Chicken	Faeces	E. Coli	Escherichia coli			0	22.7					0							18.2										13.6						4.5
	Olonitola et al (b)	2015	Olonitola2015b	Zaria	NW	400	Chicken	Faeces	Staphylococcus	Staphylococcus																0	60					80				0			13.3								13.3	33.3
39	Ugwu et al	2015	Ugwu2015	Nsukka	SE	291	Pig	Nasal & ear swab	Staphylococcus	Staphylococcus										100					12.5	65	50					50			85	45		45	0						0		100	100
40	Ayeni et al	2016	Ayeni2016	Ilishan, Ogun state	SW	100	Chicken	Faeces	Enterococci	Enterococci			73.33																			100				20											68.33
41	Eghomwanre et al	2016	Eghomwanre2016a	Warri, Delta state	SS	27	Environment	Soil, sediment	Bacillus subtillis	Bacillus		12.5	75												75	12.5										12.5										75			75
	Eghomwanre et al	2016	Eghomwanre2016b	Warri, Delta state	SS	27	Environment	Soil, sediment	Escherichia coli	Escherichia coli		75	75												75	12.5										12.5										12.5			75
	Eghomwanre et al	2016	Eghomwanre2016c	Warri, Delta state	SS	27	Environment	Soil, sediment	Streptococcus spp	Streptococcus		12.5	75												75	12.5										12.5										75			12.5
	Eghomwanre et al	2016	Eghomwanre2016d	Warri, Delta state	SS	27	Environment	Soil, sediment	Klebsiella mobillis	Klebissiella		12.5	75												75	12.5										12.5										12.5			12.5
	Eghomwanre et al	2016	Eghomwanre2016e	Warri, Delta state	SS	27	Environment	Soil, sediment	Psedomonas aeroginosa	Pseudomonas		75	75												75	12.5										12.5										12.5			75
	Eghomwanre et al	2016	Eghomwanre2016f	Warri, Delta state	SS	27	Environment	Soil, sediment	Microccus spp	Microccus		12.5	75												75	12.5										12.5										75			12.5
	Eghomwanre et al	2016	Eghomwanre2016g	Warri, Delta state	SS	27	Environment	Soil, sediment	Klebsiella Pneumonia	Klebissiella		75	75												75	12.5										12.5										12.5			75
	Eghomwanre et al	2016	Eghomwanre2016h	Warri, Delta state	SS	27	Environment	Soil, sediment	Staphylococcus aureus	Staphlococcus		75	75												75	12.5										12.5										75			75
42	Igbinosa E O (a)	2016	Igbinosa2016a	Benin	SS	56	Environment	Fish pond water	Vibrio fluvialis	Vibrio	14			77			19		33		10			8	98	0						77				8	10			38		23	31
	Igbinosa E O (b)	2016	Igbinosa2016b	Benin	SS	56	Environment	Fish pond water	Vibrio parahaemolyticus	Vibrio	0			71			20		5		7			0	76	0						93				0	5			30		12	0
	Igbinosa E O (c)	2016	Igbinosa2016c	Benin	SS	56	Environment	Fish pond water	Vibrio vulnificus	Vibrio	15			100			11		0		0			0	36	0						75				17	0			32		36	21
	Igbinosa E O (d)	2016	Igbinosa2016d	Benin	SS	56	Environment	Fish pond water	Vibrio spp	Vibrio	20			80			10		0		0			0	60	0						87				15	0			35		30	20
43	Ishola et al	2016	Ishola2016	Oyo state	SW	450	Poultry	cloaca swabs, dressed chicken	Listeria monocytogenes	Listeria		6.3	86.1		0								32.5	0		43.8		36.1				16.7				27.8													17.5
44	Ngbede et al	2016	Ngbede2016	Makurdi	NC	390	Poultry, cattle	cloaca swabs, dressed chicken	Enterococci	Enterococci
45	Odumosu et al (a)	2016	Odumosu2016a	Southwestern	SW	252	Poultry	Faeces	Pseudomonas aeroginosa	Pseudomonas	17.6							0			100					0											0
	Odumosu et al (b)	2016	Odumosu2016b	Southwestern	SW	252	Vegetables	ready to eat	Pseudomonas aeroginosa	Pseudomonas	1.9							0			83.3					0											0
	Odumosu et al (c)	2016	Odumosu2016c	Southwestern	SW	252	Cattle	Faeces	Pseudomonas aeroginosa	Pseudomonas	0							0			100					0											0
48	Umar et al	2016	Umar2016	Kaduna	NW	360	Cattle	Milk	Staphylococcus aureus	Staphylococcus				90.9						29.1					34.5	7.3						75.5				23.7				40							29.1	100
[truncated: 31 more columns]

## Sheet: S2; Comprehensive AMRS data 
Reference	Pub year	Study ID	Sample site	Geozone	Sample size	Sample Host	Samples	Microrganism	Organism	Amikacin	Amoxicillin	Amoxicillin-clavunanic acid	Ampicillin	Ampicillin-cloxacillin	Apramycin	Aztreonam	Cefepime	Cefotaxime	Cefoxitin	Ceftazidime	Ceftiofur	Ceftriaxone	Cefuroxime	Chloramphenicol	Ciprofloxacin	Clindamycin	Cloxacillin	Colistin	Enrofloxacin	Erythromycin	Florfenicol	Fusidic acid	Gentamycin	Imipenem	Kanamycin	Linezolid	Nalidixic acid	Neomycin	Nitrofuran	Norfloxacin	Meropenem	Mupirocin	Ofloxacin	Oxacillin	Penicillin	Pefloxacin	Piperacillin	Piperacillin-texobactam	Quinupristin/dalfopristin
Mzungu Ignatius	2007	Mzungu2007a	Zaria	NW	156	Environment	Dumpsite soil & water	Staphylococcus aureus	Staphylococcus		20	9																					0				90		0				0
Mzungu Ignatius	2007	Mzungu2007b	Zaria	NW	156	Environment	Dumpsite soil & water	Escherichia coli	Escherichia coli		56	33																					4				10		20				0
Mzungu Ignatius	2007	Mzungu2007c	Zaria	NW	156	Environment	Dumpsite soil & water	Pseudomonas aeruginosa	Pseudomonas		84	75																					47				18		62				3
David & Odeyemi	2007	DavidOdeyemi2007	Ado Ekiti	SW	196	Environment	Cow manure, agric soil, Vegetables	Listeria monocytogenes	Listeria		35.95	39.72												52.29			25.94			28.1			38.56
Adetunji & Adegoke	2008	Adetunjigoke2008	Southwestern	SW	40	Cattle	wara (soft cheese)	Listeria monocytogenes	Listeria			12.5	63												63					37.5			37.5
Adelowo Fagade	2009	Adelowo2009	Southwestern	SW	21	Environment	Polluted river	Multiple organisms	Multiple organisms																100					100
Rauf et al	2009	Rauf2009	Maiduguri	NE	865	Poultry	Feaces, cloacal swab, lungs, intestine, cecum	Salmonella Hiduddify	Salmonella			0	0		0						0			2.4	56.1			0			2.4		0				56.1	0
Muhammad et al	2010	Muhammad2010	Jos	NC	500	Poultry	Meconiun, dead chicks, dead in shell, egg shell	Salmonella Kentucky and Hadar	Salmonella			0	0					0						0	77.8			0	100				75.6		2		100
Ayeni et al	2009	Ayeni2009a	Southwestern	SW	96	Cattle	Dairy products and intestines	Escherichia coli	Escherichia coli	9		18	5			5		14		5		14	27		73								36				68		14							59		0
Ayeni et al	2009	Ayeni2009b	Southwestern	SW	96	Cattle	Dairy products and intestines	Enterobacter cloacae	Enterobacter	0		25	0			50		25		50		50	50		50								25				75		75							75		25
Ayeni et al	2009	Ayeni2009c	Southwestern	SW	96	Cattle	Dairy products and intestines	Citrobacter spp	Citrobacter	50		50	0			0		100		0		50	100		50								50				100		50							0		0
Ayeni et al	2009	Ayeni2009d	Southwestern	SW	96	Cattle	Dairy products and intestines	Klebsiella pneumoniae	Klebsiella	0		50	0			0		0		0		0	50		100								0				100		100							50		0
Ayeni et al	2009	Ayeni2009e	Southwestern	SW	96	Cattle	Dairy products and intestines	Pseudomonas spp.	Pseudomonas	40		100	60			40		60		40		60	100		40								60				60		60							20		0
Ayeni et al	2009	Ayeni2009f	Southwestern	SW	96	Cattle	Dairy products and intestines	Proteus mirabilis	Proteus	50		100	100			100		50		75		50	100		75								0				75		75							50		50
Garba et al	2009	Garba2009	Gusau (N/W)	NW	180	Environment	Well water, tap water, packaged water	Escherichia coli	Escherichia coli		50	20												11.6	28.3								0										13.3			0
Fashae et al	2010	Fashae2010a	Ibadan	SW	641	Poultry	Feaces	Salmonella	Salmonella			26	27												87								20				81	11
Fashae et al	2010	Fashae2010b	Ibadan	SW	991	Human	Blood	Salmonella	Salmonella			54	59		0			0			0			36	3			0			0		0				3	0
Odeyemi et al	2010	Odeyemi2010	Ado Ekiti	SW	50	Environment	Water, soil	Enterococcus	Enterococcus																	72				94		90	48												100
Ojo et al	2010	Ojo2010	Ibadan	SW	2133	Cattle, sheep, goats, pigs	Meat, faeces	Escherichia coli	Escherichia coli				82.5											42.9	21.1				25.3								37.7	24		20.8
Adesiji et al	2011	Adesiji2011a	Osogbo	SW	300	Chicken, cattle, goat, pig	Meat	Staphylococcus aureus	Staphylococcus		100			100								100	0							0			0											0		0
Adesiji et al	2011	Adesiji2011b	Osogbo	SW	300	Chicken, cattle, goat, pig	Meat	Aerobacter	Aerobacter		100														68.4								84.2										84	100		84
Adesiji et al	2011	Adesiji2011c	Osogbo	SW	300	Chicken, cattle, goat, pig	Meat	Escherichia coli	Escherichia coli		84.6			0								0	0		0					0			0										0	0		0
Adesiji et al	2011	Adesiji2011d	Osogbo	SW	300	Chicken, cattle, goat, pig	Meat	Salmonella	Salmonella		100														0																		0			0
Fortini et al	2011	Fortini2011	Ibadan	SW	200	Chicken and pigs	Faeces	Escherichia coli	Escherichia coli
Amosun et al	2012	Amosun et al2012a	Ibadan	SW	205	Cattle	Milk	Escherichia coli	Escherichia coli				85.7																								28.6	21.4
Amosun et al	2012	Amosun et al2012b	Ilorin	NC	205	Cattle	Milk	Escherichia coli	Escherichia coli				100																								35.9	25.6
Amosun et al	2012	Amosun et al2012c	Kaduna	NW	205	Cattle	Milk	Escherichia coli	Escherichia coli				18																								0	48.8
Amosun et al	2012	Amosun et al2012d	Ibadan	SW	205	Cattle	Milk	Klebsiella pneumoniae	Klebsiella				100																								19.4	96.8
Amosun et al	2012	Amosun et al2012e	Ilorin	NC	205	Cattle	Milk	Klebsiella pneumoniae	Klebsiella				79																								0	57.8
Amosun et al	2012	Amosun et al2012f	Kaduna	NW	205	Cattle	Milk	Klebsiella pneumoniae	Klebsiella				94.1																								5.9	29.4
Amosun et al	2012	Amosun et al2012g	Ibadan	SW	205	Cattle	Milk	Pseudomonas aeruginosa	Pseudomonas				84.2																								0	36.8
Amosun et al	2012	Amosun et al2012h	Ilorin	NC	205	Cattle	Milk	Pseudomonas aeruginosa	Pseudomonas				44.4																								0	0
Amosun et al (i)	2012	Amosun et al2012i	Kaduna	NW	205	Cattle	Milk	Pseudomonas aeruginosa	Pseudomonas				0																								0	0
Damian U I	2012	Damian2012	Zaria	NW	200	Cattle	Milk	Multiple organisms	Multiple organisms			83.01												83			99.35			98			17										0.7
Igbinosa et al	2012	Igbinosa2012	Benin	SS	75	Environment	Water, abattoir effluent	Pseudomonas aeruginosa	Pseudomonas	94.29						94.29	88.58			80														91.43							91.43						71.43	88.58
Akobi et al	2012	Akobi2012	Ile Ife	SW	560	Bats	Faeces	Staphylococcus aureus	Staphylococcus										0					0	5.6	3.7				7.5		2.8	0									0		0	3.7
Ojo et al	2012	Ojo2012	Abeokuta	SW	200	Poultry	chicken organs	Multiple organisms	Multiple organisms																40.5				21								9.5			44
Fashae et al	2013	Fashae2013	Ibadan	SW	306	Pig	Faeces	Salmonella enterica serovars	Salmonella															11.6	0.9								0.9				15.2
Mailafia (a)	2013	Mailafia2013a	Gwagwalada	NC	160	Environment	Naira notes	Staphlococcus spp	Staphylococcus				100																	100			100												100
Mailafia (b)	2013	Mailafia2013b	Gwagwalada	NC	160	Environment	Naira notes	Bacillus	Bacillus				100																	100			100												0
Mailafia (c)	2013	Mailafia2013c	Gwagwalada	NC	160	Environment	Naira notes	Clostridium	Clostridium				100																	0			100												100
Mailafia (d)	2013	Mailafia2013d	Gwagwalada	NC	160	Environment	Naira notes	Escherichia coli	Escherichia coli				0																	0			0												100
Mailafia (e)	2013	Mailafia2013e	Gwagwalada	NC	160	Environment	Naira notes	Streptococcus spp	Streptococcus				100																	100			100												100
Oluduro et al (a)	2012	Oluduro2012a	Ile Ife	SW	125	Bats	Faeces	Escherichia coli	Escherichia coli			92	82									30			2								22						54				1			2
Oluduro et al (b)	2012	Oluduro2012b	Ile Ife	SW	125	Poultry	Broiler faeces	Escherichia coli	Escherichia coli			74	64									24			32								54						44				7			30
Oluduro et al (c)	2012	Oluduro2012c	Ile Ife	SW	125	Poultry	Free range chicken faeces	Escherichia coli	Escherichia coli			60	80									32			12								40						68				12			0
Kawo et al (a)	2013	Kawo2013a	Kano	NW	30	Environment	Mobile cell phone	Escherichia coli	Escherichia coli		10	57.1													71.4								28.6													100
Kawo et al (b)	2013	Kawo2013b	Kano	NW	30	Environment	Mobile cell phone	Staphylococcus aureus	Staphylococcus		53.3	53.3													93.3								20													80
Kawo et al (c)	2013	Kawo2013c	Kano	NW	30	Environment	Mobile cell phone	Salmonella spp.	Salmonella		100	50													100								0													0
Kawo et al (d)	2013	Kawo2013d	Kano	NW	30	Environment	Mobile cell phone	Klebsiella spp	Klebsiella		75	100													75								25													100
Ogunleye et al	2013	Ogunleye2013a	Ibadan	SW	1	Poultry	Organs	Salmonella Ituri	Salmonella				1											75
Ogunleye et al	2013	Ogunleye2013b	Ibadan	SW	1	Poultry	Organs	Salmonella Kentucky	Salmonella				75											75
Ogunleye et al	2013	Ogunleye2013c	Ibadan	SW	1	Poultry	Organs	Salmonella Typhimurium DT104	Salmonella				75											75
Oviasogie et al (a)	2013	Oviasogie2013a	Benin	SS	165	Environment, Human	Mucipal waste, Human hand and cloth swabs	Bacillus subtilis	Bacillus		40			20								25		25	5					30			5										10			0
Oviasogie et al (b)	2013	Oviasogie2013b	Benin	SS	165	Environment, Human	Mucipal waste, Human hand and cloth swabs	Bacillus cereus	Bacillus		28.6			28.6								28.6		0	0					42.9			0										14.3			0
Oviasogie et al (c)	2013	Oviasogie2013c	Benin	SS	165	Environment, Human	Mucipal waste, Human hand and cloth swabs	Staphylococcus aureus	Staphylococcus		37.5			12.5								12.5		25	0					37.5			0										0			0
Oviasogie et al (d)	2013	Oviasogie2013d	Benin	SS	165	Environment, Human	Mucipal waste, Human hand and cloth swabs	Staphylococcus epidemidis	Staphylococcus		33.4			20								20		33.4	0					13.4			0										6.7			6.7
Oviasogie et al (e)	2013	Oviasogie2013e	Benin	SS	165	Environment, Human	Mucipal waste, Human hand and cloth swabs	Escherichia coli	Escherichia coli		28.6			28.6								14.3		14.3	4.8					47.6			14.3										14.5			9.5
Oviasogie et al (f)	2013	Oviasogie2013f	Benin	SS	165	Environment, Human	Mucipal waste, Human hand and cloth swabs	Proteus mirabilis	Proteus		45.5			36.4								27.3		18.2	0					45.5			0										0			0
Oviasogie et al (g)	2013	Oviasogie2013g	Benin	SS	165	Environment, Human	Mucipal waste, Human hand and cloth swabs	Proteus vulgaris	Proteus		28.6			28.6								14.3		14.3	0					42.9			0										28.6			14.3
Oviasogie et al (h)	2013	Oviasogie2013h	Benin	SS	165	Environment, Human	Mucipal waste, Human hand and cloth swabs	Proteus rettgerri	Proteus		100			50								50		0	0					100			0										50			0
Oviasogie et al (i)	2013	Oviasogie2013i	Benin	SS	165	Environment, Human	Mucipal waste, Human hand and cloth swabs	Streptococcus pyogenes	Streptococcus		0			0								33.3		32.3	16.7					33.3			0										33.3			0
Oviasogie et al (j)	2013	Oviasogie2013j	Benin	SS	165	Environment, Human	Mucipal waste, Human hand and cloth swabs	Enterococcus faecalis	Enterococcus		35.7			21.4								7.2		42.9	0					28.6			7.2										33.3			0
Oviasogie et al (k)	2013	Oviasogie2013k	Benin	SS	165	Environment, Human	Mucipal waste, Human hand and cloth swabs	Klebsiella pneumoniae	Klebsiella		100			100								40		40	20					80			20										33.3			20
Oviasogie et al (l)	2013	Oviasogie2013l	Benin	SS	165	Environment, Human	Mucipal waste, Human hand and cloth swabs	Klebsiella aerogenes	Klebsiella		71.4			71.4								14.3		42.9	14.3					42.9			28.6										33.3			0
Oviasogie et al (m)	2013	Oviasogie2013m	Benin	SS	165	Environment, Human	Mucipal waste, Human hand and cloth swabs	Pseudomonas aeruginosa	Pseudomonas		81.8			81.8								9.1		54.6	0					72.7			27.3										33.3			9.1
Oviasogie et al (n)	2013	Oviasogie2013	Benin	SS	165	Environment, Human	Mucipal waste, Human hand and cloth swabs	Citrobacter freundii	Citrobacter		77.8			66.7								22.2		11.1	0					66.4			11.1										33.3			11.1
Oviasogie et al (o)	2013	Oviasogie2013o	Benin	SS	165	Environment, Human	Mucipal waste, Human hand and cloth swabs	Serratia marcescens	Serratia		100			100								25		100	0					100			0										33.3			25
Rauf et al	2013	Rauf2013	Northwestern	NW	1888	Cattle, Camels, Poultry, Fish, Vegetable, Human	Mucipal waste, Human hand and cloth swabs	Salmonella spp.	Salmonella			0	9		0			1			0			5	9			1			1		7				9	3
Suleiman et al	2013	Suleiman2013	Maiduguri	NE	100	Poultry	Trachea swab	Staphylococcus aureus	Staphylococcus			33.3	100									57.4			0	51.9				100			0										57.4
Adelowo et al	2014	Adelowo2014	Ogbomoso, Ibadan, Osogbo	SW		Poultry, Swine	Faeces, water, soil	Escherichia coli	Escherichia coli			0	36		0			0			0			22	42			0			0		8				25	14
Adefarakan et al (a)	2014	Adefarakan2014a	Ile Ife	SW	400	Ram	Rectal swab	Escherichia coli	Escherichia coli		69.79	29.17										98.96		13.54	10.42								21.88						97				15.63			6.25
Adefarakan et al (b)	2014	Adefarakan2014b	Ile Ife	SW		Goat	Rectal swab	Escherichia coli	Escherichia coli		12.86	70										15.71		15.71	15.71								84.28						95.71				1.43			27.14
Adeyanju et al (a)	2014	Adeyanju2014a	Ibadan	SW	152	Poultry	Meat	Salmonella	Salmonella			100																					29				73		56				16
Adeyanju et al (b)	2014	Adeyanju2014b	Ibadan	SW		Poultry	Meat	Escherichia coli	Escherichia coli			100																					28.3				59		52				24
Rauf et al	2014	Rauf2014	Maiduguri	NE	300	Vegetables	Vegetables	Salmonella Hadar	Salmonella			0	8		0			0			0			0	8			0			8		0				8	15
Rauf et al	2015	Rauf2015	Maiduguri	NE	200	Camel	Faeces, organs	Salmonella spp.	Salmonella			0	0			0		0			0			0	0			0			0		0				0	0
Adenipekun et al (a)	2015	Adenipekun2015a	Lagos	SW	350	Cattle	Faeces	Escherichia coli	Escherichia coli	0			35			0	0		1	0		0	0		1.9								2.9								0							0
Adenipekun et al (b)	2015	Adenipekun2015b	Lagos	SW		Chicken	Faeces	Escherichia coli	Escherichia coli	0			41.3			6.3	0		0	0		6.3	6.3		10								20								0							1.3
Adenipekun et al (c)	2015	Adenipekun2015c	Lagos	SW		Pig	Faeces	Escherichia coli	Escherichia coli	0			10.7			3.6	0		0	0		3.6	3.6		3.6								0								0							0
Olowe et al	2015	Olowe2015	Ado Ekiti	SW	350	Cattle, pigs	Faeces	Escherichia coli	Escherichia coli		88	96	89					92		58			83	92	5		84			82			49	0					0				5	96
Olonitola et al (a)	2015	Olonitola2015a	Zaria	NW	400	Chicken	Faeces	Escherichia coli	Escherichia coli			0	22.7					0							18.2								13.6						4.5
Olonitola et al (b)	2015	Olonitola2015b	Zaria	NW	400	Chicken	Faeces	Staphlococcus spp	Staphylococcus																0	60				80			0			13.3								13.3	33.3				26.7
Ugwu et al	2015	Ugwu2015	Nsukka	SE	291	Pig	Nasal & ear swab	Staphlococcus spp	Staphylococcus										100					12.5	65	50				50		85	45		45	0						0		100	100
Ayeni et al	2016	Ayeni2016	Ilishan, Ogun state	SW	100	Chicken	Faeces	Enterococcus	Enterococcus			73.33																		100			20											68.33
Eghomwanre et al	2016	Eghomwanre2016a	Warri, Delta state	SS	27	Environment	Soil, sediment	Bacillus subtilis	Bacillus		12.5	75												75	12.5								12.5										75			75
Eghomwanre et al	2016	Eghomwanre2016b	Warri, Delta state	SS	27	Environment	Soil, sediment	Escherichia coli	Escherichia coli		75	75												75	12.5								12.5										12.5			75
Eghomwanre et al	2016	Eghomwanre2016c	Warri, Delta state	SS	27	Environment	Soil, sediment	Streptococcus spp	Streptococcus		12.5	75												75	12.5								12.5										75			12.5
Eghomwanre et al	2016	Eghomwanre2016d	Warri, Delta state	SS	27	Environment	Soil, sediment	Klebsiella mobillis	Klebsiella		12.5	75												75	12.5								12.5										12.5			12.5
Eghomwanre et al	2016	Eghomwanre2016e	Warri, Delta state	SS	27	Environment	Soil, sediment	Pseudomonas aeruginosa	Pseudomonas		75	75												75	12.5								12.5										12.5			75
Eghomwanre et al	2016	Eghomwanre2016f	Warri, Delta state	SS	27	Environment	Soil, sediment	Micrococcus spp	Micrococcus		12.5	75												75	12.5								12.5										75			12.5
Eghomwanre et al	2016	Eghomwanre2016g	Warri, Delta state	SS	27	Environment	Soil, sediment	Klebsiella pneumoniae	Klebsiella		75	75												75	12.5								12.5										12.5			75
Eghomwanre et al	2016	Eghomwanre2016h	Warri, Delta state	SS	27	Environment	Soil, sediment	Staphylococcus aureus	Staphylococcus		75	75												75	12.5								12.5										75			75
Igbinosa E O (a)	2016	Igbinosa2016a	Benin	SS	56	Environment	Fish pond water	Vibrio fluvialis	Vibrio	14			77			19		33		10			8	98	0					77			8	10			38		23	31
Igbinosa E O (b)	2016	Igbinosa2016b	Benin	SS	56	Environment	Fish pond water	Vibrio parahaemolyticus	Vibrio	0			71			20		5		7			0	76	0					93			0	5			30		12	0
Igbinosa E O (c)	2016	Igbinosa2016c	Benin	SS	56	Environment	Fish pond water	Vibrio vulnificus	Vibrio	15			100			11		0		0			0	36	0					75			17	0			32		36	21
Igbinosa E O (d)	2016	Igbinosa2016d	Benin	SS	56	Environment	Fish pond water	Vibrio spp	Vibrio	20			80			10		0		0			0	60	0					87			15	0			35		30	20
Ishola et al	2016	Ishola2016	Oyo state	SW	450	Poultry	cloaca swabs, dressed chicken	Listeria monocytogenes	Listeria		6.3	86.1		0								32.5	0		43.8		36.1			16.7			27.8													17.5
Ngbede et al	2016	Ngbede2016	Makurdi	NC	390	Poultry, cattle	cloaca swabs, dressed chicken	Enterococcus	Enterococcus
Odumosu et al (a)	2016	Odumosu2016a	Southwestern	SW	252	Poultry	Faeces	Pseudomonas aeruginosa	Pseudomonas	17.6							0			100					0									0														0
Odumosu et al (b)	2016	Odumosu2016b	Southwestern	SW	252	Vegetables	ready to eat	Pseudomonas aeruginosa	Pseudomonas	1.9							0			83.3					0									0														0
Odumosu et al (c)	2016	Odumosu2016c	Southwestern	SW	252	Cattle	Faeces	Pseudomonas aeruginosa	Pseudomonas	0							0			100					0									0														0
Umar et al	2016	Umar2016	Kaduna	NW	360	Cattle	Milk	Staphylococcus aureus	Staphylococcus				90.9						29.1					34.5	7.3					75.5			23.7				40							29.1	100
[truncated: 28 more columns]

## Sheet: S3; Categorized AMRS data
Reference	Pub year	Study ID	Sample site	Geozone	Sample size	Sample Host	Samples	Microrganism	Organism	Amikacin	Amoxicillin	Amoxicillin-clavunanic acid	Ampicillin	Ampicillin-cloxacillin	Apramycin	Aztreonam	Cefepime	Cefotaxime	Cefoxitin	Ceftazidime	Ceftiofur	Ceftriaxone	Cefuroxime	Chloramphenicol	Ciprofloxacin	Clindamycin	Cloxacillin	Colistin	Enrofloxacin	Erythromycin	Florfenicol	Fusidic acid	Gentamycin	Imipenem	Kanamycin	Linezolid	Nalidixic acid	Neomycin	Nitrofuran	Norfloxacin	Meropenem	Mupirocin	Ofloxacin	Oxacillin	Penicillin	Pefloxacin	Piperacillin	Piperacillin-texobactam	Quinupristin/dalfopristin
Mzungu Ignatius	2007	Mzungu2007a	Zaria	NW	156	Environment	Dumpsite soil & water	Staphylococcus aureus	Staphylococcus		2	2																	2				2				5		1				1
Mzungu Ignatius	2007	Mzungu2007b	Zaria	NW	156	Environment	Dumpsite soil & water	Escherichia coli	Escherichia coli		4	3																					2				2		2				1
Mzungu Ignatius	2007	Mzungu2007c	Zaria	NW	156	Environment	Dumpsite soil & water	Pseudomonas aeruginosa	Pseudomonas		5	5																					3				2		4				2
David & Odeyemi	2007	DavidOdeyemi2007	Ado Ekiti	SW	196	Environment	Cow manure, agric soil, Vegetables	Listeria monocytogenes	Listeria		3	3												4			3			3			3
Adetunji & Adegoke	2008	Adetunjigoke2008	Southwestern	SW	40	Cattle	wara (soft cheese)	Listeria monocytogenes	Listeria			2	4												4					3			3
Adelowo Fagade	2009	Adelowo2009	Southwestern	SW	21	Environment	Polluted river	Multiple organisms	Multiple organisms																5					5
Rauf et al	2009	Rauf2009	Maiduguri	NE	865	Poultry	Feaces, cloacal swab, lungs, intestine, cecum	Salmonella Hiduddify	Salmonella			1	1		1						1			2	4			1			2		1				4	1
Muhammad et al	2010	Muhammad2010	Jos	NC	500	Poultry	Meconiun, dead chicks, dead in shell, egg shell	Salmonella Kentucky and Hadar	Salmonella			1	1					1						1	5			1	5				5		2		5
Ayeni et al	2009	Ayeni2009a	Southwestern	SW	96	Cattle	Dairy products and intestines	Escherichia coli	Escherichia coli	2		2	2			3		2		2		2	5		4								3				4		2							4		2
Ayeni et al	2009	Ayeni2009b	Southwestern	SW	96	Cattle	Dairy products and intestines	Enterobacter cloacae	Enterobacter	1		3	1			3		4		3		3	3		3								3				5		5							5		3
Ayeni et al	2009	Ayeni2009c	Southwestern	SW	96	Cattle	Dairy products and intestines	Citrobacter spp	Citrobacter	3		3	1			1		5		1		3	5		3								3				5		3							1		1
Ayeni et al	2009	Ayeni2009d	Southwestern	SW	96	Cattle	Dairy products and intestines	Klebsiella pneumoniae	Klebsiella	1		3	1			1		1		1		1	3		5								1				5		5							3		1
Ayeni et al	2009	Ayeni2009e	Southwestern	SW	96	Cattle	Dairy products and intestines	Pseudomonas spp.	Pseudomonas	3		5	4			3		4		3		5	5		3								4				4		4							2		1
Ayeni et al	2009	Ayeni2009f	Southwestern	SW	96	Cattle	Dairy products and intestines	Proteus mirabilis	Proteus	3		5	5			5		3		5		3	5		5								1				5		5							3		3
Garba et al	2009	Garba2009	Gusau (N/W)	NW	180	Environment	Well water, tap water, packaged water	Escherichia coli	Escherichia coli		3	2												2	3								1										2			1
Fashae et al	2010	Fashae2010a	Ibadan	SW	641	Poultry	Feaces	Salmonella	Salmonella			3	3												5								2				5	2
Fashae et al	2010	Fashae2010b	Ibadan	SW	991	Human	Blood	Salmonella	Salmonella			4	4		1			1			1			3	2			1			1		1				2	1
Odeyemi et al	2010	Odeyemi2010	Ado Ekiti	SW	50	Environment	Water, soil	Enterococcus	Enterococcus																	4				5		5	3												5
Ojo et al	2010	Ojo2010	Ibadan	SW	2133	Cattle, sheep, goats, pigs	Meat, faeces	Escherichia coli	Escherichia coli				5											3	2				3								3	2		3
Adesiji et al	2011	Adesiji2011a	Osogbo	SW	300	Chicken, cattle, goat, pig	Meat	Staphylococcus aureus	Staphylococcus		5			5								5	1							1			1											1		1
Adesiji et al	2011	Adesiji2011b	Osogbo	SW	300	Chicken, cattle, goat, pig	Meat	Aerobacter	Aerobacter		5														4								5										5	5		5
Adesiji et al	2011	Adesiji2011c	Osogbo	SW	300	Chicken, cattle, goat, pig	Meat	Escherichia coli	Escherichia coli		5			1								1	1		1					1			1										1	1		1
Adesiji et al	2011	Adesiji2011d	Osogbo	SW	300	Chicken, cattle, goat, pig	Meat	Salmonella	Salmonella		5														1																		1			1
Fortini et al	2011	Fortini2011	Ibadan	SW	200	Chicken and pigs	Faeces	Escherichia coli	Escherichia coli
Amosun et al	2012	Amosun et al2012a	Ibadan	SW	205	Cattle	Milk	Escherichia coli	Escherichia coli				5																								3	2
Amosun et al	2012	Amosun et al2012b	Ilorin	NC	205	Cattle	Milk	Escherichia coli	Escherichia coli				5																								3	3
Amosun et al	2012	Amosun et al2012c	Kaduna	NW	205	Cattle	Milk	Escherichia coli	Escherichia coli				2																								1	3
Amosun et al	2012	Amosun et al2012d	Ibadan	SW	205	Cattle	Milk	Klebsiella pneumoniae	Klebsiella				5																								2	5
Amosun et al	2012	Amosun et al2012e	Ilorin	NC	205	Cattle	Milk	Klebsiella pneumoniae	Klebsiella				5																								1	4
Amosun et al	2012	Amosun et al2012f	Kaduna	NW	205	Cattle	Milk	Klebsiella pneumoniae	Klebsiella				5																								2	3
Amosun et al	2012	Amosun et al2012g	Ibadan	SW	205	Cattle	Milk	Pseudomonas aeruginosa	Pseudomonas				5																								1	3
Amosun et al	2012	Amosun et al2012h	Ilorin	NC	205	Cattle	Milk	Pseudomonas aeruginosa	Pseudomonas				3																								1	1
Amosun et al (i)	2012	Amosun et al2012i	Kaduna	NW	205	Cattle	Milk	Pseudomonas aeruginosa	Pseudomonas				1																								1	1
Damian U I	2012	Damian2012	Zaria	NW	200	Cattle	Milk	Multiple organisms	Multiple organisms			5												5			5			5			2										1
Igbinosa et al	2012	Igbinosa2012	Benin	SS	75	Environment	Water, abattoir effluent	Pseudomonas aeruginosa	Pseudomonas	5						5	5			5														5							5						4	5
Akobi et al	2012	Akobi2012	Ile Ife	SW	560	Bats	Faeces	Staphylococcus aureus	Staphylococcus										1					1	2	2				2		2	1									1		1	2
Ojo et al	2012	Ojo2012	Abeokuta	SW	200	Poultry	chicken organs	Multiple organisms	Multiple organisms																3				2								2			3
Fashae et al	2013	Fashae2013	Ibadan	SW	306	Pig	Faeces	Salmonella enterica serovars	Salmonella															2	1								1				2
Mailafia (a)	2013	Mailafia2013a	Gwagwalada	NC	160	Environment	Naira notes	Staphlococcus spp	Staphylococcus				5																	5			5												5
Mailafia (b)	2013	Mailafia2013b	Gwagwalada	NC	160	Environment	Naira notes	Bacillus	Bacillus				5																	5			5												1
Mailafia (c)	2013	Mailafia2013c	Gwagwalada	NC	160	Environment	Naira notes	Clostridium	Clostridium				5																	1			5												5
Mailafia (d)	2013	Mailafia2013d	Gwagwalada	NC	160	Environment	Naira notes	Escherichia coli	Escherichia coli				1																	1			1												5
Mailafia (e)	2013	Mailafia2013e	Gwagwalada	NC	160	Environment	Naira notes	Streptococcus spp	Streptococcus				5																	5			5												5
Oluduro et al (a)	2012	Oluduro2012a	Ile Ife	SW	125	Bats	Faeces	Escherichia coli	Escherichia coli			5	5									3			2								2						4				1			2
Oluduro et al (b)	2012	Oluduro2012b	Ile Ife	SW	125	Poultry	Broiler faeces	Escherichia coli	Escherichia coli			4	4									2			3								4						3				2			3
Oluduro et al (c)	2012	Oluduro2012c	Ile Ife	SW	125	Poultry	Free range chicken faeces	Escherichia coli	Escherichia coli			4	5									3			2								3						4				2			1
Kawo et al (a)	2013	Kawo2013a	Kano	NW	30	Environment	Mobile cell phone	Escherichia coli	Escherichia coli		2	4													4								3													5
Kawo et al (b)	2013	Kawo2013b	Kano	NW	30	Environment	Mobile cell phone	Staphylococcus aureus	Staphylococcus		4	4													5								2													5
Kawo et al (c)	2013	Kawo2013c	Kano	NW	30	Environment	Mobile cell phone	Salmonella spp.	Salmonella		5	3													5								1													1
Kawo et al (d)	2013	Kawo2013d	Kano	NW	30	Environment	Mobile cell phone	Klebsiella spp	Klebsiella		5	5													5								3													5
Ogunleye et al	2013	Ogunleye2013a	Ibadan	SW	1	Poultry	Organs	Salmonella Ituri	Salmonella				1											5
Ogunleye et al	2013	Ogunleye2013b	Ibadan	SW	1	Poultry	Organs	Salmonella Kentucky	Salmonella				5											5
Ogunleye et al	2013	Ogunleye2013c	Ibadan	SW	1	Poultry	Organs	Salmonella Typhimurium DT104	Salmonella				5											5
Oviasogie et al (a)	2013	Oviasogie2013a	Benin	SS	165	Environment, Human	Mucipal waste, Human hand and cloth swabs	Bacillus subtilis	Bacillus		3			3								3		3	2					3			2										2			1
Oviasogie et al (b)	2013	Oviasogie2013b	Benin	SS	165	Environment, Human	Mucipal waste, Human hand and cloth swabs	Bacillus cereus	Bacillus		3			3								3		1	1					3			1										2			1
Oviasogie et al (c)	2013	Oviasogie2013c	Benin	SS	165	Environment, Human	Mucipal waste, Human hand and cloth swabs	Staphylococcus aureus	Staphylococcus		3			2								2		3	1					3			1										1			1
Oviasogie et al (d)	2013	Oviasogie2013d	Benin	SS	165	Environment, Human	Mucipal waste, Human hand and cloth swabs	Staphylococcus epidemidis	Staphylococcus		3			2								2		3	1					2			1										2			2
Oviasogie et al (e)	2013	Oviasogie2013e	Benin	SS	165	Environment, Human	Mucipal waste, Human hand and cloth swabs	Escherichia coli	Escherichia coli		3			3								2		2	2					3			2										2			2
Oviasogie et al (f)	2013	Oviasogie2013f	Benin	SS	165	Environment, Human	Mucipal waste, Human hand and cloth swabs	Proteus mirabilis	Proteus		3			3								3		2	1					3			1										1			1
Oviasogie et al (g)	2013	Oviasogie2013g	Benin	SS	165	Environment, Human	Mucipal waste, Human hand and cloth swabs	Proteus vulgaris	Proteus		3			3								2		2	1					3			1										3			2
Oviasogie et al (h)	2013	Oviasogie2013h	Benin	SS	165	Environment, Human	Mucipal waste, Human hand and cloth swabs	Proteus rettgerri	Proteus		5			3								3		1	1					5			1										3			1
Oviasogie et al (i)	2013	Oviasogie2013i	Benin	SS	165	Environment, Human	Mucipal waste, Human hand and cloth swabs	Streptococcus pyogenes	Streptococcus		1			1								3		3	2					3			1										3			1
Oviasogie et al (j)	2013	Oviasogie2013j	Benin	SS	165	Environment, Human	Mucipal waste, Human hand and cloth swabs	Enterococcus faecalis	Enterococcus		3			2								2		3	1					3			2										3			1
Oviasogie et al (k)	2013	Oviasogie2013k	Benin	SS	165	Environment, Human	Mucipal waste, Human hand and cloth swabs	Klebsiella pneumoniae	Klebsiella		5			5								3		3	2					5			2										3			2
Oviasogie et al (l)	2013	Oviasogie2013l	Benin	SS	165	Environment, Human	Mucipal waste, Human hand and cloth swabs	Klebsiella aerogenes	Klebsiella		4			4								2		3	2					3			3										3			1
Oviasogie et al (m)	2013	Oviasogie2013m	Benin	SS	165	Environment, Human	Mucipal waste, Human hand and cloth swabs	Pseudomonas aeruginosa	Pseudomonas		5			5								2		4	1					4			3										3			2
Oviasogie et al (n)	2013	Oviasogie2013	Benin	SS	165	Environment, Human	Mucipal waste, Human hand and cloth swabs	Citrobacter freundii	Citrobacter		5			4								2		2	1					4			2										3			2
Oviasogie et al (o)	2013	Oviasogie2013o	Benin	SS	165	Environment, Human	Mucipal waste, Human hand and cloth swabs	Serratia marcescens	Serratia		5			5								3		5	1					5			1										3			3
Rauf et al	2013	Rauf2013	Northwestern	NW	1888	Cattle, Camels, Poultry, Fish, Vegetable, Human	Mucipal waste, Human hand and cloth swabs	Salmonella spp.	Salmonella			1	2		1			1			1			2	2			1			1		2				2	2
Suleiman et al	2013	Suleiman2013	Maiduguri	NE	100	Poultry	Trachea swab	Staphylococcus aureus	Staphylococcus			3	5									4			1	4				5			1										4
Adelowo et al	2014	Adelowo2014	Ogbomoso, Ibadan, Osogbo	SW		Poultry, Swine	Faeces, water, soil	Escherichia coli	Escherichia coli			1	3		1			1			1			2	3			1			1		2				3	2
Adefarakan et al (a)	2014	Adefarakan2014a	Ile Ife	SW	400	Ram	Rectal swab	Escherichia coli	Escherichia coli		4	3										5		2	2								2						5				2			2
Adefarakan et al (b)	2014	Adefarakan2014b	Ile Ife	SW		Goat	Rectal swab	Escherichia coli	Escherichia coli		2	4										2		2	2								5						5				2			3
Adeyanju et al (a)	2014	Adeyanju2014a	Ibadan	SW	152	Poultry	Meat	Salmonella	Salmonella			5																					3				4		4				2
Adeyanju et al (b)	2014	Adeyanju2014b	Ibadan	SW		Poultry	Meat	Escherichia coli	Escherichia coli			5																					3				4		4				2
Rauf et al	2014	Rauf2014	Maiduguri	NE	300	Vegetables	Vegetables	Salmonella Hadar	Salmonella			1	2		1			1			1			1	2			1			2		1				2	2
Rauf et al	2015	Rauf2015	Maiduguri	NE	200	Camel	Faeces, organs	Salmonella spp.	Salmonella			1	1			1		1			1			1	1			1			1		1				1	1
Adenipekun et al (a)	2015	Adenipekun2015a	Lagos	SW	350	Cattle	Faeces	Escherichia coli	Escherichia coli	1			3			1	5		1	1		1	1		2								2								5							1
Adenipekun et al (b)	2015	Adenipekun2015b	Lagos	SW		Chicken	Faeces	Escherichia coli	Escherichia coli	1			3			2	1		1	1		2	2		2								2								1							2
Adenipekun et al (c)	2015	Adenipekun2015c	Lagos	SW		Pig	Faeces	Escherichia coli	Escherichia coli	1			2			2	1		1	1		2	2		2								1								1							1
Olowe et al	2015	Olowe2015	Ado Ekiti	SW	350	Cattle, pigs	Faeces	Escherichia coli	Escherichia coli		5	5	5					5		4			5	5	2		5			5			3	2					1				2	5
Olonitola et al (a)	2015	Olonitola2015a	Zaria	NW	400	Chicken	Faeces	Escherichia coli	Escherichia coli			1	2					1							2								2						2
Olonitola et al (b)	2015	Olonitola2015b	Zaria	NW	400	Chicken	Faeces	Staphlococcus spp	Staphylococcus																1	4				5			1			2								2	3				3
Ugwu et al	2015	Ugwu2015	Nsukka	SE	291	Pig	Nasal & ear swab	Staphlococcus spp	Staphylococcus										5					2	4	3				3		5	3		3	1						1		5	5
Ayeni et al	2016	Ayeni2016	Ilishan, Ogun state	SW	100	Chicken	Faeces	Enterococcus	Enterococcus			4																		5			2											4
Eghomwanre et al	2016	Eghomwanre2016a	Warri, Delta state	SS	27	Environment	Soil, sediment	Bacillus subtilis	Bacillus		2	5												5	2								2										5			5
Eghomwanre et al	2016	Eghomwanre2016b	Warri, Delta state	SS	27	Environment	Soil, sediment	Escherichia coli	Escherichia coli		5	5												5	2								2										2			5
Eghomwanre et al	2016	Eghomwanre2016c	Warri, Delta state	SS	27	Environment	Soil, sediment	Streptococcus spp	Streptococcus		2	5												5	2								2										5			2
Eghomwanre et al	2016	Eghomwanre2016d	Warri, Delta state	SS	27	Environment	Soil, sediment	Klebsiella mobillis	Klebsiella		2	5												5	2								2										2			2
Eghomwanre et al	2016	Eghomwanre2016e	Warri, Delta state	SS	27	Environment	Soil, sediment	Pseudomonas aeruginosa	Pseudomonas		5	5												5	2								2										2			5
Eghomwanre et al	2016	Eghomwanre2016f	Warri, Delta state	SS	27	Environment	Soil, sediment	Micrococcus spp	Micrococcus		2	5												5	2								2										5			2
Eghomwanre et al	2016	Eghomwanre2016g	Warri, Delta state	SS	27	Environment	Soil, sediment	Klebsiella pneumoniae	Klebsiella		5	5												5	2								2										2			5
Eghomwanre et al	2016	Eghomwanre2016h	Warri, Delta state	SS	27	Environment	Soil, sediment	Staphylococcus aureus	Staphylococcus		5	5												5	2								2										5			5
Igbinosa E O (a)	2016	Igbinosa2016a	Benin	SS	56	Environment	Fish pond water	Vibrio fluvialis	Vibrio	2			5			2		3		2			2	5	1					5			2	2			3		2	3
Igbinosa E O (b)	2016	Igbinosa2016b	Benin	SS	56	Environment	Fish pond water	Vibrio parahaemolyticus	Vibrio	1			4			2		2		2			1	5	1					5			1	2			3		2	1
Igbinosa E O (c)	2016	Igbinosa2016c	Benin	SS	56	Environment	Fish pond water	Vibrio vulnificus	Vibrio	2			5			2		1		1			1	3	1					5			2	1			3		3	2
Igbinosa E O (d)	2016	Igbinosa2016d	Benin	SS	56	Environment	Fish pond water	Vibrio spp	Vibrio	2			5			2		1		1			1	4	1					5			2	1			3		3	2
Ishola et al	2016	Ishola2016	Oyo state	SW	450	Poultry	cloaca swabs, dressed chicken	Listeria monocytogenes	Listeria		2	5		1								3	1		3		3			2			3													2
Ngbede et al	2016	Ngbede2016	Makurdi	NC	390	Poultry, cattle	cloaca swabs, dressed chicken	Enterococcus	Enterococcus
Odumosu et al (a)	2016	Odumosu2016a	Southwestern	SW	252	Poultry	Faeces	Pseudomonas aeruginosa	Pseudomonas	2							1			5					1									1														1
Odumosu et al (b)	2016	Odumosu2016b	Southwestern	SW	252	Vegetables	ready to eat	Pseudomonas aeruginosa	Pseudomonas	2							1			5					1									1														1
Odumosu et al (c)	2016	Odumosu2016c	Southwestern	SW	252	Cattle	Faeces	Pseudomonas aeruginosa	Pseudomonas	1							1			5					1									1														1
Umar et al	2016	Umar2016	Kaduna	NW	360	Cattle	Milk	Staphylococcus aureus	Staphylococcus				5						3					3	2					5			2				3							3	5
										1= No resistance	1= No resistance	1= No resistance	1= No resistance	1= No resistance	1= No resistance	1= No resistance	1= No resistance	1= No resistance	1= No resistance	1= No resistance	1= No resistance	1= No resistance	1= No resistance	1= No resistance	1= No resistance	1= No resistance	1= No resistance	1= No resistance	1= No resistance	1= No resistance	1= No resistance	1= No resistance	1= No resistance	1= No resistance	1= No resistance	1= No resistance	1= No resistance	1= No resistance	1= No resistance	1= No resistance	1= No resistance	1= No resistance	1= No resistance	1= No resistance	1= No resistance	1= No resistance	1= No resistance	1= No resistance	1= No resistance
										2= Very low resistance	2= Very low resistance	2= Very low resistance	2= Very low resistance	2= Very low resistance	2= Very low resistance	2= Very low resistance	2= Very low resistance	2= Very low resistance	2= Very low resistance	2= Very low resistance	2= Very low resistance	2= Very low resistance	2= Very low resistance	2= Very low resistance	2= Very low resistance	2= Very low resistance	2= Very low resistance	2= Very low resistance	2= Very low resistance	2= Very low resistance	2= Very low resistance	2= Very low resistance	2= Very low resistance	2= Very low resistance	2= Very low resistance	2= Very low resistance	2= Very low resistance	2= Very low resistance	2= Very low resistance	2= Very low resistance	2= Very low resistance	2= Very low resistance	2= Very low resistance	2= Very low resistance	2= Very low resistance	2= Very low resistance	2= Very low resistance	2= Very low resistance	2= Very low resistance
										3= Low resistance	3= Low resistance	3= Low resistance	3= Low resistance	3= Low resistance	3= Low resistance	3= Low resistance	3= Low resistance	3= Low resistance	3= Low resistance	3= Low resistance	3= Low resistance	3= Low resistance	3= Low resistance	3= Low resistance	3= Low resistance	3= Low resistance	3= Low resistance	3= Low resistance	3= Low resistance	3= Low resistance	3= Low resistance	3= Low resistance	3= Low resistance	3= Low resistance	3= Low resistance	3= Low resistance	3= Low resistance	3= Low resistance	3= Low resistance	3= Low resistance	3= Low resistance	3= Low resistance	3= Low resistance	3= Low resistance	3= Low resistance	3= Low resistance	3= Low resistance	3= Low resistance	3= Low resistance
										4= High resistance	4= High resistance	4= High resistance	4= High resistance	4= High resistance	4= High resistance	4= High resistance	4= High resistance	4= High resistance	4= High resistance	4= High resistance	4= High resistance	4= High resistance	4= High resistance	4= High resistance	4= High resistance	4= High resistance	4= High resistance	4= High resistance	4= High resistance	4= High resistance	4= High resistance	4= High resistance	4= High resistance	4= High resistance	4= High resistance	4= High resistance	4= High resistance	4= High resistance	4= High resistance	4= High resistance	4= High resistance	4= High resistance	4= High resistance	4= High resistance	4= High resistance	4= High resistance	4= High resistance	4= High resistance	4= High resistance
										5= Very high resistance	5= Very high resistance	5= Very high resistance	5= Very high resistance	5= Very high resistance	5= Very high resistance	5= Very high resistance	5= Very high resistance	5= Very high resistance	5= Very high resistance	5= Very high resistance	5= Very high resistance	5= Very high resistance	5= Very high resistance	5= Very high resistance	5= Very high resistance	5= Very high resistance	5= Very high resistance	5= Very high resistance	5= Very high resistance	5= Very high resistance	5= Very high resistance	5= Very high resistance	5= Very high resistance	5= Very high resistance	5= Very high resistance	5= Very high resistance	5= Very high resistance	5= Very high resistance	5= Very high resistance	5= Very high resistance	5= Very high resistance	5= Very high resistance	5= Very high resistance	5= Very high resistance	5= Very high resistance	5= Very high resistance	5= Very high resistance	5= Very high resistance	5= Very high resistance
[truncated: 28 more columns]
